# Supplementary figures and images for: Academic Tangping Scale for College Students in China: Scale Development, Validation and Application
Source: Research Square preprint supplement (doi:10.21203/rs.3.rs-6731705/v1), 2025-10-27

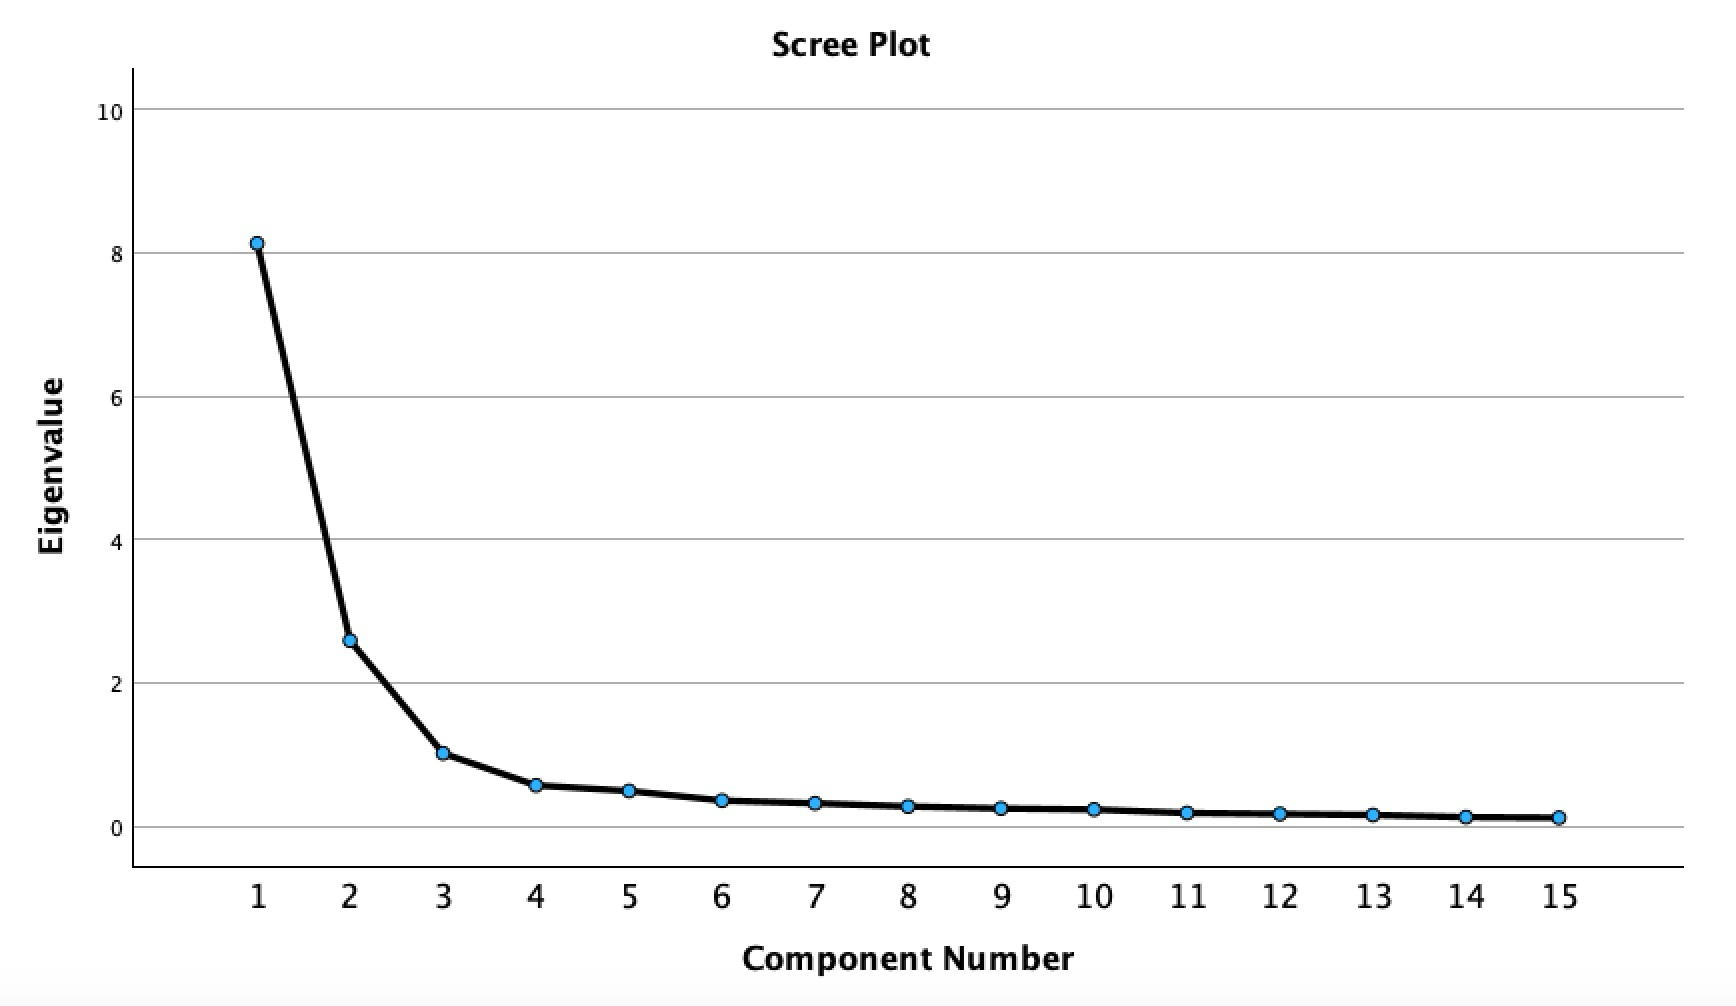


Figure 1. Scree Plot


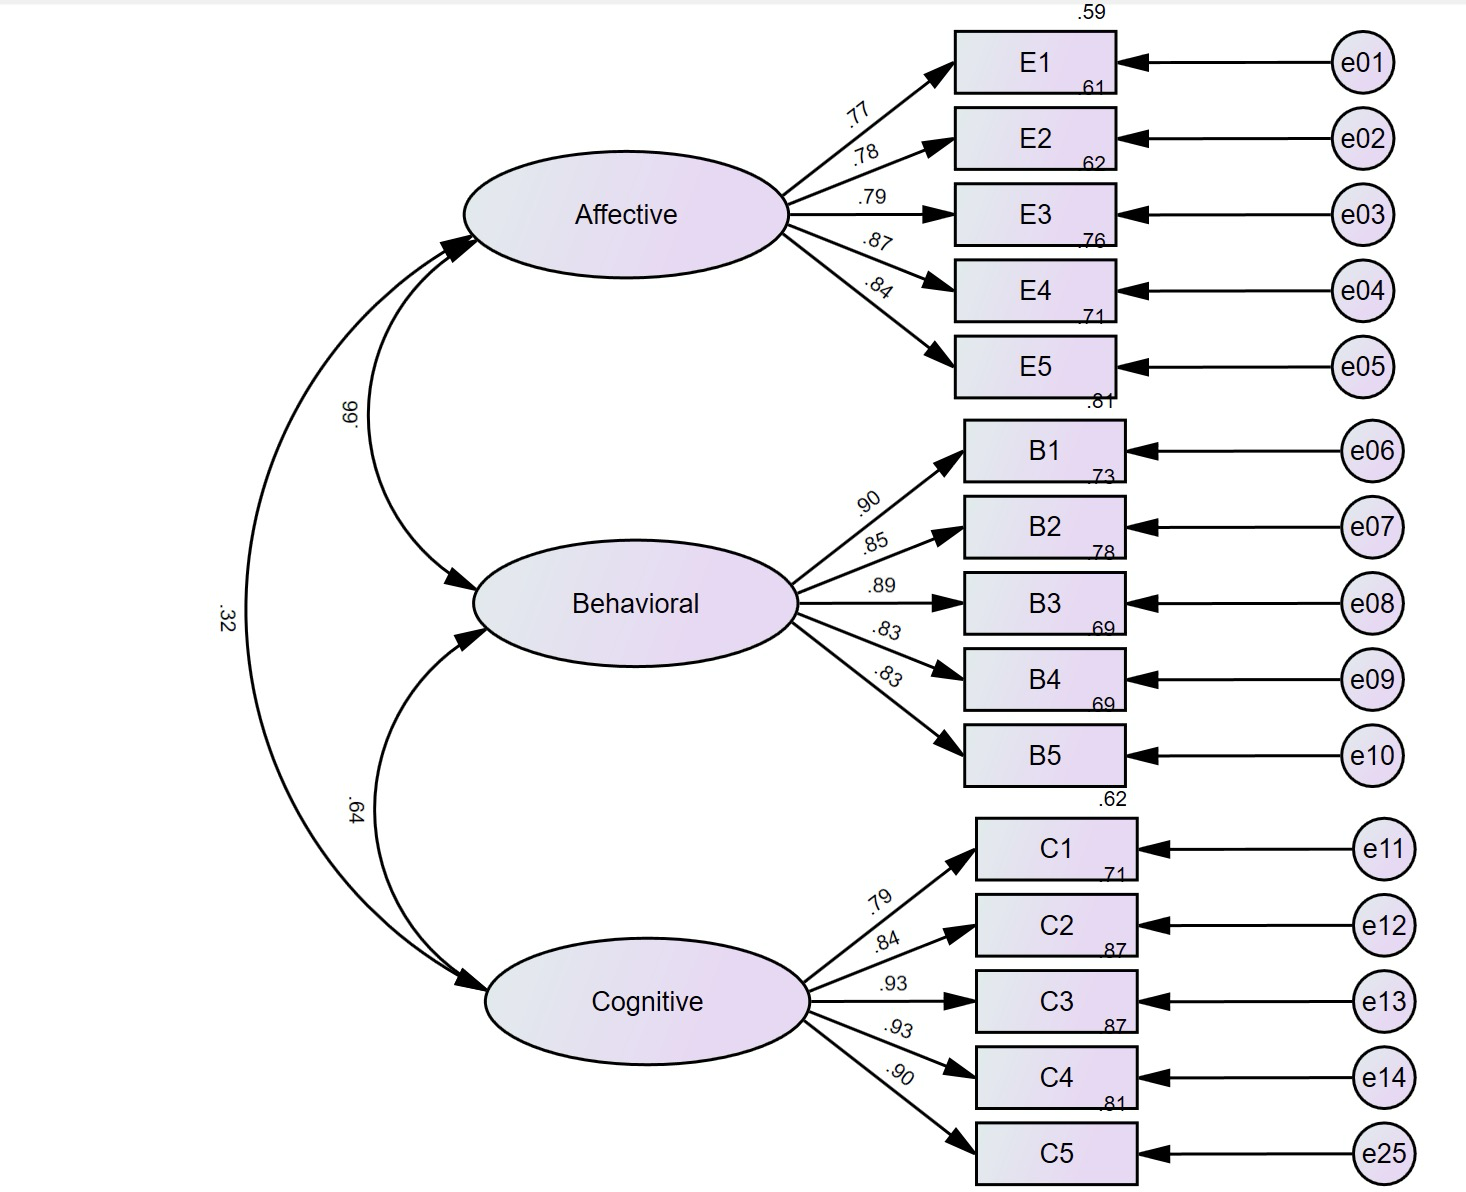


Figure 2. Three-factor Structure of Academic Tangping Scale

Supplement: Supplementary file 2 [file 4460d9f871e5de017602d9bd.docx]
